# Supplementary material
Source: ML conference proceedings conference paper supplement (https://proceedings.neurips.cc/paper_files/paper/2017/hash/ea204361fe7f024b130143eb3e189a18-Abstract.html)

## 8 Appendix

To lighten the notation system, we drop the feature transform  $\mathbf{f}$  from our equations. The analysis procedure does not change with or without  $\mathbf{f}$ .

### 8.1 Relationship between Trimmed DRE and Binary SVM [23, 4]

Consider a “symmetrized” extension to the criterion (6):

$$\begin{aligned} & \min_{\delta} \text{KL}[p|q \cdot r_{\delta}] + \text{KL}[q|p \cdot 1/r_{\delta}] \\ & \approx c - \max_{\delta} \frac{1}{n_p} \sum_{i=1}^{n_p} \log \hat{r}(\mathbf{x}_p^{(i)}; \delta) + \frac{1}{n_q} \sum_{i=1}^{n_q} \log \hat{r}_2(\mathbf{x}_q^{(i)}; \delta) \end{aligned} \quad (13)$$

that jointly minimizes the KL divergence from  $P$  to  $Q$  and from  $Q$  to  $P$ . Similar to (5), we use  $\hat{r}_2$  to model the ratio  $q/p$ :

$$\hat{r}_2(\mathbf{x}; \delta) = \frac{\exp\langle -\delta, \mathbf{x} \rangle}{\hat{N}_2(\delta)}, \quad \hat{N}_2(\delta) := \frac{1}{n_p} \sum_{j=1}^{n_p} \exp\langle -\delta, \mathbf{x}_p^{(j)} \rangle.$$

The minus in front of the  $\delta$  is due to the inversion of the ratio. We can trim the objective function (13) and add a regularization term  $\lambda R(\delta)$  as we did for the asymmetric one:

$$\max_{\delta} \frac{1}{n_p} \sum_{i=1}^{n_p} [\log \hat{r}(\mathbf{x}_p^{(i)}; \delta) - t_0]_- + \frac{1}{n_q} \sum_{i=1}^{n_q} [\log \hat{r}_2(\mathbf{x}_q^{(i)}; \delta) - t_0]_- - \lambda R(\delta) \quad (14)$$

**Proposition 2.** *If  $n_p = n_q, t_0 = 1, R(\cdot) = \|\cdot\|_2^2$ , the maximizer  $\hat{\delta}$  of (14) is the same as the primal solution of a modified SVM using  $X_p$  and  $X_q$  as positive and negative class respectively.*

It suggests SVM learns an *unnormalized* and *trimmed* density ratio function as the decision function.

*Proof.* By introducing the slack variables as we did in (7), (14) can be rewritten as:

$$\begin{aligned} & \min_{\delta, \epsilon \geq 0} \frac{1}{n_p} \langle \epsilon_p, \mathbf{1} \rangle + \frac{1}{n_q} \langle \epsilon_q, \mathbf{1} \rangle + \lambda R(\delta) \\ & \text{s.t. } \forall \mathbf{x}_p^{(i)} \in X_p, \forall \mathbf{x}_q^{(i)} \in X_q, \\ & \quad \log \hat{r}(\mathbf{x}_p^{(i)}; \delta) \geq t_0 - \epsilon_{p,i}, \\ & \quad \log \hat{r}_2(\mathbf{x}_q^{(i)}; \delta) \geq t_0 - \epsilon_{q,i}, \end{aligned} \quad (15)$$

After substituting  $\hat{r}$  and  $\hat{r}_2$ , (15) can be re-written as

$$\begin{aligned} & \min_{\delta, \epsilon \geq 0} \frac{1}{n_p} \langle \epsilon_p, \mathbf{1} \rangle + \frac{1}{n_q} \langle \epsilon_q, \mathbf{1} \rangle + \lambda R(\delta) \\ & \text{s.t. } \forall \mathbf{x}_p^{(i)} \in X_p, \forall \mathbf{x}_q^{(i)} \in X_q, \\ & \quad \langle \delta, \mathbf{x}_p^{(i)} \rangle - \log \hat{N}(\delta) \geq t_0 - \epsilon_{p,i}, \\ & \quad \langle -\delta, \mathbf{x}_q^{(i)} \rangle - \log \hat{N}_2(\delta) \geq t_0 - \epsilon_{q,i}. \end{aligned} \quad (16)$$

Let  $n_p = n_q, t_0 = 1, R(\delta) = \|\delta\|^2$ , (16) is an SVM (without a bias term) using  $X_p$  and  $X_q$  as positive and negative samples respectively, except the presences of log normalization terms  $\log \hat{N}(\delta)$  and  $\log \hat{N}_2(\delta)$ .  $\square$

### 8.2 Proof of Proposition 1

*Proof.* To prove the statement, we construct the dual of (8) which has the exactly same form as (9). Denote  $\mathbf{X}_p = [\mathbf{x}_p^{(1)}, \dots, \mathbf{x}_p^{(n_p)}] \in \mathbb{R}^{d \times n_p}$  and  $\mathbf{X}_q = [\mathbf{x}_q^{(1)}, \dots, \mathbf{x}_q^{(n_q)}] \in \mathbb{R}^{d \times n_q}$ .

The Lagrangian of (8) can be written as

$$\begin{aligned} l(\boldsymbol{\alpha}, \boldsymbol{\alpha}', \boldsymbol{\alpha}'', \boldsymbol{\delta}, t, \boldsymbol{\epsilon}) = & -\langle \boldsymbol{\alpha}, \boldsymbol{\delta}^\top \mathbf{X}_p - \log \hat{N}(\boldsymbol{\delta}) \cdot \mathbf{1} - t \cdot \mathbf{1} + \boldsymbol{\epsilon} \rangle \\ & -\langle \boldsymbol{\alpha}', \boldsymbol{\epsilon} \rangle - \boldsymbol{\alpha}'' \cdot t + \frac{1}{n_p} \langle \boldsymbol{\epsilon}, \mathbf{1} \rangle - \nu \cdot t + \lambda R(\boldsymbol{\delta}) \end{aligned} \quad (17)$$

where  $\boldsymbol{\alpha} \in \mathbb{R}_+^{n_p}$ ,  $\boldsymbol{\alpha}' \in \mathbb{R}_+$ ,  $\boldsymbol{\alpha}'' \in \mathbb{R}_+$ . Now we analyze the KKT condition of the above Lagrangian.

Suppose the optimal  $\hat{t} > 0^5$ , then  $\boldsymbol{\alpha}'' = 0$  by the slackness condition that  $t' \boldsymbol{\alpha}'' = 0$ . The optimality condition of  $t$  in (17) yields:

$$\nabla_t l(\boldsymbol{\alpha}, \boldsymbol{\alpha}', \boldsymbol{\alpha}'', \boldsymbol{\delta}, t, \boldsymbol{\epsilon}) = \langle \boldsymbol{\alpha}, \mathbf{1} \rangle - \nu = 0 \rightarrow \sum_{i=1}^{n_p} \alpha_i = \nu, \quad (18)$$

and the optimality condition of  $\boldsymbol{\epsilon}$  yields

$$\nabla_{\boldsymbol{\epsilon}} l(\boldsymbol{\alpha}, \boldsymbol{\alpha}', \boldsymbol{\alpha}'', \boldsymbol{\delta}, t, \boldsymbol{\epsilon}) = \mathbf{0} \rightarrow -\boldsymbol{\alpha} - \boldsymbol{\alpha}' + \frac{1}{n_p} \cdot \mathbf{1} = \mathbf{0} \quad (19)$$

From (18) and (19), and the slackness condition of optimization (7), we can see  $\mathbf{x}_p^{(i)} \in \mathbf{X}_p$ , if  $\log \hat{r}(\mathbf{x}_p^{(i)}; \boldsymbol{\delta}) < t$ , then  $\epsilon_i > 0$  which leads to  $\alpha'_i = 0$  (the constraint of  $\epsilon_i \geq 0$  is ineffective) and thus  $\alpha_i = \frac{1}{n_p}$ .

In contrast, if  $\log \hat{r}(\mathbf{x}_p^{(i)}; \boldsymbol{\delta}) > t$ , then we have  $\alpha_i = 0$ ,  $\epsilon_i = 0$  (the constraint of  $\epsilon_i \geq 0$  is effective). If  $\log \hat{r}(\mathbf{x}_p^{(i)}; \boldsymbol{\delta})$  falls right on the boundary  $t$ , i.e.,  $\log r(\mathbf{x}_p^{(i)}; \boldsymbol{\delta}) = t$ ,  $\alpha_i \in [0, \frac{1}{n_p}]$ , since the KKT condition  $\epsilon_i \alpha'_i = 0$  indicating  $\alpha'_i$  can take non-negative values as long as  $\frac{1}{n_p} \cdot \mathbf{1} = \boldsymbol{\alpha} + \boldsymbol{\alpha}'$ . We summarize:

$$\begin{cases} \alpha_i = \frac{1}{n_p} & \log \hat{r}(\mathbf{x}_p^{(i)}; \boldsymbol{\delta}) < t \\ 0 \leq \alpha_i \leq \frac{1}{n_p} & \log \hat{r}(\mathbf{x}_p^{(i)}; \boldsymbol{\delta}) = t \\ \alpha_i = 0 & \log \hat{r}(\mathbf{x}_p^{(i)}; \boldsymbol{\delta}) > t. \end{cases} \quad (20)$$

It can be observed that for (8),  $(\boldsymbol{\delta} = \mathbf{0}, \boldsymbol{\epsilon} = 0.2 \cdot \mathbf{1}, t = 0.1)$  is a feasible interior point, and it makes all inequality constraints strict, so the Slater's condition holds for our original primal problem which is also convex. Therefore, the lagrangian dual of the original problem (8) is

$$\begin{aligned} & \min_{\boldsymbol{\delta}} \max_{\boldsymbol{\alpha} \geq 0, \boldsymbol{\alpha}' \geq 0, \boldsymbol{\alpha}'' \geq 0} \min_{\boldsymbol{\epsilon}, t} l(\boldsymbol{\alpha}, \boldsymbol{\alpha}', \boldsymbol{\alpha}'', \boldsymbol{\delta}, t, \boldsymbol{\epsilon}) \\ & = \min_{\boldsymbol{\delta}} \max_{\boldsymbol{\alpha}} -\langle \boldsymbol{\alpha}, \boldsymbol{\delta}^\top \mathbf{X}_p - \log \hat{N}(\boldsymbol{\delta}) \rangle + \lambda R(\boldsymbol{\delta}) \end{aligned} \quad (21)$$

$$s.t. \boldsymbol{\alpha} \in \left[0, \frac{1}{n_p}\right]^{n_p}, \langle \mathbf{1}, \boldsymbol{\alpha} \rangle = \nu. \quad (22)$$

which is the same as (9) and any points satisfy the KKT condition are both dual (22) and primal (8) optimal.  $\square$

### 8.3 Lemma 1

**Lemma 1.** If Assumptions 1 and 2 hold, then

$$-\mathbf{u}^\top \nabla_{\boldsymbol{\delta}}^2 \mathcal{L}(\boldsymbol{\delta}^* + \mathbf{u}, \mathbf{w}^*) \mathbf{u} \geq \frac{\nu \kappa_1'}{2C_r^2} \|\mathbf{u}\|^2 - \frac{\nu c}{2C_r^2} \cdot \frac{\|\mathbf{u}\|_1^2}{\sqrt{n_q}}, \quad (23)$$

where  $c$  is the constant determined by Assumption 2.

<sup>5</sup>if  $t = 0$  is the optimal and assume  $R(\mathbf{0}) = 0$ , we only have a trivial solution  $\boldsymbol{\delta} = \mathbf{0}, \boldsymbol{\epsilon} = \mathbf{0}$ , which is easy to verify and rules out.

*Proof.* First, we write down  $-\nabla_{\delta}^2 \mathcal{L}(\delta^* + \mathbf{u}, \mathbf{w}^*)$ :

$$\begin{aligned}
-\nabla_{\delta}^2 \mathcal{L}(\delta^* + \mathbf{u}, \mathbf{w}^*) &= -\nabla^2 \sum_{i=1}^{n_p} w_i^* \cdot \log \hat{r}(\mathbf{x}_p^{(i)}; \delta^* + \mathbf{u}) \\
&= -\sum_{i=1}^{n_p} w_i^* \cdot \nabla^2 \log \hat{N}(\delta^* + \mathbf{u}) \\
&= -\nu \cdot \nabla^2 \log \hat{N}(\delta^* + \mathbf{u}), \\
&= \nu \cdot \sum_{i=1}^{n_q} \frac{e^{(i)}}{s} \cdot \mathbf{x}_q^{(i)} \left( \mathbf{x}_q^{(i)} \right)^\top - \nu \cdot \left\{ \sum_{i=1}^{n_q} \frac{e^{(i)}}{s} \cdot \left( \mathbf{x}_q^{(i)} \right) \right\} \left\{ \sum_{i=1}^{n_q} \frac{e^{(i)}}{s} \cdot \left( \mathbf{x}_q^{(i)} \right) \right\}^\top
\end{aligned}$$

where  $e^{(j)} := \exp[\langle \delta^* + \mathbf{u}, \mathbf{x}^{(j)} \rangle]$ ,  $s := \sum_{j=1}^{n_q} e^{(j)}$ .

$$\begin{aligned}
&\nu \mathbf{u}^\top \left\{ \sum_{i=1}^{n_q} \frac{e^{(i)}}{s} \cdot \mathbf{x}^{(i)} \left( \mathbf{x}^{(i)} \right)^\top - \left\{ \sum_{i=1}^{n_q} \frac{e^{(i)}}{s} \cdot \left( \mathbf{x}^{(i)} \right) \right\} \left\{ \sum_{i=1}^{n_q} \frac{e^{(i)}}{s} \cdot \left( \mathbf{x}^{(i)} \right) \right\}^\top \right\} \mathbf{u} \\
&= \frac{\nu}{2} \mathbf{u}^\top \left\{ \sum_{i=1}^{n_q} \sum_{j \neq i} \frac{e^{(i)} e^{(j)}}{s^2} \left( \mathbf{x}^{(i)} - \mathbf{x}^{(j)} \right) \left( \mathbf{x}^{(i)} - \mathbf{x}^{(j)} \right)^\top \right\} \mathbf{u}
\end{aligned}$$

Due to Assumption 1,  $\frac{e^{(i)}}{s} \geq \frac{1}{C_r n_q}$ . Let  $\xi_{i,j} = \left( \mathbf{x}^{(i)} - \mathbf{x}^{(j)} \right) \left( \mathbf{x}^{(i)} - \mathbf{x}^{(j)} \right)^\top$ , then we have the following inequalities

$$\frac{\nu}{2} \mathbf{u}^\top \left\{ \sum_{i=1}^{n_q} \sum_{j \neq i} \frac{e^{(i)} e^{(j)}}{s^2} \xi_{i,j} \right\} \mathbf{u} \geq \frac{\nu}{2C_r^2} \mathbf{u}^\top \left\{ \frac{1}{n_q^2} \sum_{i=1}^{n_q} \sum_{j \neq i} \xi_{i,j} \right\} \mathbf{u} = \frac{\nu}{2C_r^2} \mathbf{u}^\top \text{cov}(\mathbf{X}_q) \mathbf{u}$$

We then invoke Assumption 2 to obtain  $\frac{\nu}{2C_r^2} \mathbf{u}^\top \text{cov}(\mathbf{X}_q) \mathbf{u} \geq \frac{\nu \kappa'_1}{2C_r^2} \|\mathbf{u}\|^2 - \frac{\nu c}{2C_r^2 \sqrt{n_q}} \|\mathbf{u}\|_1^2$ .  $\square$

#### 8.4 Proof of Theorem 1

*Proof.* First, we define the  $S$  and  $S^c$  are the set of indices of non-zero and zero elements of  $\delta^*$ . The cardinality of  $S$  is  $k$ .

Define  $\hat{\mathbf{u}} := \hat{\delta} - \delta^*$ . From the Lemma 1 we can see that,

$$\langle \nabla_{\delta} \mathcal{L}(\hat{\delta}, \mathbf{w}^*) - \nabla_{\delta} \mathcal{L}(\delta^*, \mathbf{w}^*), \hat{\mathbf{u}} \rangle \geq \kappa_1 \|\hat{\mathbf{u}}\|^2 - \tau_1(n, d) \|\hat{\mathbf{u}}\|_1^2,$$

where we set  $\kappa_1 := \frac{\nu \kappa'_1}{2C_r^2}$ ,  $\tau_1(n, d) := \frac{\nu c}{2C_r^2 \sqrt{n_q}}$ . Using Holder's inequality,

$$\langle \nabla_{\delta} \mathcal{L}(\hat{\delta}, \mathbf{w}^*), \hat{\mathbf{u}} \rangle + \|\nabla_{\delta} \mathcal{L}(\delta^*, \mathbf{w}^*)\|_{\infty} \|\hat{\mathbf{u}}\|_1 + \tau_1(n, d) \rho \|\hat{\mathbf{u}}\|_1 \geq \kappa_1 \|\hat{\mathbf{u}}\|^2.$$

The introduction of  $\rho$  is due to the bounded optimization region. Due to (11), we can convert the above inequality into

$$\langle \nabla_{\delta} \mathcal{L}(\hat{\delta}, \hat{\mathbf{w}}), \hat{\mathbf{u}} \rangle + \kappa_2 \|\hat{\mathbf{u}}\|^2 + \tau_2(n, d) \|\hat{\mathbf{u}}\|_1 + \|\nabla_{\delta} \mathcal{L}(\delta^*, \mathbf{w}^*)\|_{\infty} \|\hat{\mathbf{u}}\|_1 + \rho \tau_1(n, d) \|\hat{\mathbf{u}}\|_1 \geq \kappa_1 \|\hat{\mathbf{u}}\|^2,$$

and because of the setting of  $\lambda_n$ ,

$$\langle \nabla_{\delta} \mathcal{L}(\hat{\delta}, \hat{\mathbf{w}}), \hat{\mathbf{u}} \rangle + \frac{\lambda_n}{2} \|\hat{\mathbf{u}}\|_1 \geq (\kappa_1 - \kappa_2) \|\hat{\mathbf{u}}\|^2, \quad (24)$$

Note that in the first term,  $\hat{\delta}$  is obtained at the stationary condition, which implies that there is a subgradient, denoted by  $\nabla \|\hat{\delta}\|_1$ , such that

$$\nabla_{\delta} \mathcal{L}(\hat{\delta}, \hat{\mathbf{w}}) = -\lambda_n \nabla_{\delta} \|\hat{\delta}\|_1 = -\lambda_n \nabla_{\delta} \|\hat{\mathbf{u}} + \delta^*\|_1,$$

(the second  $\nabla$  is the subgradient notation) thus we can obtain the upper-bound of  $\langle \nabla_{\delta} \mathcal{L}(\hat{\delta}, \hat{\mathbf{w}}), \hat{\mathbf{u}} \rangle$  using the following standard procedure:

$$\begin{aligned}
\langle \nabla_{\delta} \mathcal{L}(\hat{\delta}, \hat{\mathbf{w}}), \hat{\mathbf{u}} \rangle &= -\lambda_n \langle \nabla_{\delta} \|\hat{\mathbf{u}} + \delta^*\|_1, \hat{\mathbf{u}} \rangle \\
&\leq -\lambda_n (\|\hat{\delta}\|_1 - \|\delta^*\|_1) \text{ due to convexity of } \|\delta\|_1 \text{ and the definition of subgradient.} \\
&= \lambda_n (\|\delta^*\|_1 + \|\hat{\mathbf{u}}_{S^c}\|_1 - \|\hat{\mathbf{u}}_{S^c}\|_1 - \|\hat{\delta}\|_1) \\
&= \lambda_n (\|\delta^* + \hat{\mathbf{u}}_{S^c}\|_1 - \|\hat{\mathbf{u}}_{S^c}\|_1 - \|\hat{\delta}\|_1) \\
&= \lambda_n (\|\delta^* + \hat{\mathbf{u}}_{S^c}\|_1 + \|\hat{\mathbf{u}}_S\|_1 - \|\hat{\mathbf{u}}_S\|_1 - \|\hat{\mathbf{u}}_{S^c}\|_1 - \|\hat{\delta}\|_1) \\
&\leq \lambda_n (\|\delta^* + \hat{\mathbf{u}}_S + \hat{\mathbf{u}}_{S^c}\|_1 + \|\hat{\mathbf{u}}_S\|_1 - \|\hat{\mathbf{u}}_{S^c}\|_1 - \|\hat{\delta}\|_1) \\
&\leq \lambda_n (\|\hat{\mathbf{u}}_S\|_1 - \|\hat{\mathbf{u}}_{S^c}\|_1)
\end{aligned} \tag{25}$$

Combining (24) and (25) we have

$$\begin{aligned}
\lambda_n (\|\hat{\mathbf{u}}_S\|_1 - \|\hat{\mathbf{u}}_{S^c}\|_1) + \frac{\lambda_n}{2} \|\hat{\mathbf{u}}\|_1 &\geq (\kappa_1 - \kappa_2) \|\hat{\mathbf{u}}\|^2 \\
\frac{3\lambda_n}{2} \|\hat{\mathbf{u}}_S\|_1 - \frac{\lambda_n}{2} \|\hat{\mathbf{u}}_{S^c}\|_1 &\geq (\kappa_1 - \kappa_2) \|\hat{\mathbf{u}}\|^2 \\
\frac{3\lambda_n \sqrt{k}}{2} \|\hat{\mathbf{u}}\|_2 &\geq (\kappa_1 - \kappa_2) \|\hat{\mathbf{u}}\|^2 \\
\frac{1}{(\kappa_1 - \kappa_2)} \cdot \frac{3\sqrt{k}\lambda_n}{2} &\geq \|\hat{\mathbf{u}}\|.
\end{aligned} \tag{26}$$

Substituting  $\kappa_1$  and  $\tau_1(n, d)$  according to Lemma 1, we have the conclusion in Theorem 1.  $\square$

## 8.5 Proof of Theorem 2

Now let's specify  $\kappa_2$  and  $\tau_2$  in Theorem 1 under the outlier setting and derive the consistency.

Let's consider (11). It is easy to see that

$$\nabla_{\delta} \mathcal{L}(\hat{\delta}, \hat{\mathbf{w}}) - \nabla_{\delta} \mathcal{L}(\hat{\delta}, \mathbf{w}^*) = \sum_{i \in \hat{G}} w_i \mathbf{f}(\mathbf{x}_p^{(i)}) - \frac{1}{n_p} \sum_{i \in G} \mathbf{f}(\mathbf{x}_p^{(i)}), \text{ where } \hat{G} := \{\mathbf{x}_p^{(i)} | \hat{w}_i \neq 0\}.$$

It is obvious that if  $\hat{G} \equiv G$  and  $\forall i \in \hat{G}, \hat{w}_i = \frac{1}{n_p}$ , and  $\forall i \in B, \hat{w}_i = 0$ ,  $\nabla_{\delta} \mathcal{L}(\hat{\delta}, \hat{\mathbf{w}}) - \nabla_{\delta} \mathcal{L}(\hat{\delta}, \mathbf{w}^*) = 0$ .

**Lemma 2.** *If there exists a “clearance” between the good samples and the bad samples, such that  $\min_{j \in B} z_{\delta^*}(\mathbf{x}_p^{(j)}) - \max_{i \in G} z_{\delta^*}(\mathbf{x}_p^{(i)}) \geq 3C_{\text{lip}}\rho$ , then  $\nabla_{\delta} \mathcal{L}(\hat{\delta}, \hat{\mathbf{w}}) - \nabla_{\delta} \mathcal{L}(\hat{\delta}, \mathbf{w}^*) = 0$ .*

*Proof.*

$$\min_{j \in B} z_{\delta^*}(\mathbf{x}_p^{(j)}) - \max_{i \in G} z_{\delta^*}(\mathbf{x}_p^{(i)}) = \min_{j \in B} \hat{z}_{\delta^*}(\mathbf{x}_p^{(j)}) - \max_{i \in G} \hat{z}_{\delta^*}(\mathbf{x}_p^{(i)}) \geq 3C_{\text{lip}}\rho \tag{27}$$

Due to Assumption 3 and (27),

$$\forall i \in G, j \in B, \text{ and } \mathbf{u} \in \text{Ball}(\rho), \hat{z}_{\delta^* + \mathbf{u}}(\mathbf{x}_p^{(j)}) > \hat{z}_{\delta^* + \mathbf{u}}(\mathbf{x}_p^{(i)}). \tag{28}$$

According to the optimality condition of (9), we should simply assign non-zero weights  $w_i$  to the  $\nu n_p$  samples corresponding to the smallest  $\hat{z}_{\delta^* + \mathbf{u}}$  values. Therefore, from (28) we can see that  $\hat{G} = G$ .

Moreover, since the inequality of (28) holds strictly and  $\nu = \frac{|G|}{n_p} = \frac{|\hat{G}|}{n_p}$ , all weights must be set to  $\frac{1}{n_p}$  in order to minimize the inner problem of (9), i.e.,  $\forall i \in G, \hat{w}_i = \frac{1}{n_p}$  and  $\forall i \in B, \hat{w}_i = 0$ .  $\square$

Now we can set  $\kappa_2 = 0, \tau_2(n, d) = 0$  to make (11) hold.

As explained in Section (5.1), we need to confirm  $\|\nabla_{\delta} \mathcal{L}(\delta^*, \mathbf{w}^*)\|_{\infty}$  converges to 0 as the sample size goes to infinity where  $\nabla_{\delta} \mathcal{L}(\delta^*, \mathbf{w}^*) = \frac{1}{n_p} \sum_{i \in G} \nabla_{\delta} \hat{z}_{\delta^*}(\mathbf{x}_p^{(i)})$ . Since

$$\left\| \frac{1}{n_p} \sum_{i \in G} \nabla_{\delta} \hat{z}_{\delta^*}(\mathbf{x}_p^{(i)}) \right\|_{\infty} \leq \frac{1}{\nu} \cdot \left\| \frac{1}{n_p} \sum_{i \in G} \nabla_{\delta} \hat{z}_{\delta^*}(\mathbf{x}_p^{(i)}) \right\|_{\infty} = \left\| \frac{1}{|G|} \sum_{i \in G} \nabla_{\delta} \hat{z}_{\delta^*}(\mathbf{x}_p^{(i)}) \right\|_{\infty},$$

we only need to bound  $\left\| \frac{1}{|G|} \sum_{i \in G} \nabla_{\delta} \hat{z}_{\delta^*}(\mathbf{x}_p^{(i)}) \right\|_{\infty}$ . As samples in  $G$  are i.i.d. samples drawn from  $P$ , here can we invoke the Lemma 2 from [14]. First we need the following conditions:

**Assumption 6.** For any vector  $\mathbf{u} \in \mathbb{R}^{\dim(\delta^*)}$  such that  $\delta^* + \mathbf{u} \in \text{Ball}(\rho)$ , the Hessian of the likelihood function,  $\nabla^2 \mathcal{L}(\delta^* + \mathbf{u})$ , has a bounded spectral norm, i.e.,  $\|\nabla^2 \mathcal{L}(\delta^* + \mathbf{u})\| \leq \lambda_{\max}$ .

**Assumption 7** (Smooth Density Ratio Model Assumption). For any vector  $\mathbf{u} \in \mathbb{R}^{\dim(\delta^*)}$  such that  $\delta^* + \mathbf{u} \in \text{Ball}(\rho)$  and every  $a \in \mathbb{R}$ , the following inequality holds:

$$\mathbb{E}_q [\exp(a(r(\mathbf{x}, \delta^* + \mathbf{u}) - 1))] \leq \exp(Ka^2).$$

If  $n_q = \Omega(|G|^2)$ , and  $\lambda_n \geq \sqrt{\frac{K_1 \log d}{|G|}}$ , according to Lemma 2 from [14] we have

$$P \left( \left\| \frac{1}{|G|} \sum_{i \in G} \nabla_{\delta} \hat{z}_{\delta^*}(\mathbf{x}_p^{(i)}) \right\|_{\infty} \geq \lambda_n \right) \leq \exp(-c_1 |G|), \quad (29)$$

where  $K_1$  and  $c_1$  are constants. Finally, we can re-state the Theorem 1 using  $\kappa_2 = 0$ ,  $\tau_2 = 0$  and (29) to obtain Theorem 2.

## 8.6 Proof of Theorem 3

First we verify (11).

**Lemma 3.** Under Assumptions 4 and 5,

$$\|\nabla_{\delta} \mathcal{L}(\hat{\delta}, \hat{\mathbf{w}}) - \nabla_{\delta} \mathcal{L}(\hat{\delta}, \mathbf{w}^*)\|_{\infty} \leq 2C_{\text{CDF}} \cdot \|\mathbf{u}\|_{C_p} + \frac{2L \cdot C_p}{\sqrt{n_p}},$$

where  $L$  is a positive constant. The second term reflects the cost of using the empirical sample to control the  $\nu$ -th quantile in (28).

Therefore

$$\begin{aligned} \langle \nabla_{\delta} \mathcal{L}(\hat{\delta}, \hat{\mathbf{w}}) - \nabla_{\delta} \mathcal{L}(\hat{\delta}, \mathbf{w}^*), \mathbf{u} \rangle &\geq - \left( 2C_{\text{CDF}} \cdot \|\mathbf{u}\|_{C_p} + \frac{2L \cdot C_p}{\sqrt{n_p}} \right) \|\mathbf{u}\|_1^2 \\ &\geq - 2\sqrt{k} C_{\text{CDF}} C_p \|\mathbf{u}\|^2 - \frac{2L \cdot C_p \|\mathbf{u}\|_1}{\sqrt{n_p}}. \end{aligned}$$

It can be seen that  $\kappa_2 = 2\sqrt{k} C_{\text{CDF}} C_p$ ,  $\tau_2(n, d) = \frac{2L \cdot C_p}{\sqrt{n_p}}$ . The proof of Lemma 3 uses a fact that only  $\mathbf{x}_p$  in the “zone”  $T(\mathbf{u}, \frac{L_1}{\sqrt{n_p}})$  are “dangerous” as they may be mistakenly included or missed out under small perturbation of  $\mathbf{u}$ . See Section 8.8 in Appendix for the proof.

To show  $\|\nabla_{\delta} \mathcal{L}(\delta^*, \mathbf{w}^*)\|_{\infty} \rightarrow 0$ , we need some extra procedures since  $z_{\delta^*}(\mathbf{x}_q)$  are not necessarily upper-bounded by  $t(\delta^*)$ . The following lemma bounds  $\|\nabla_{\delta} \mathcal{L}(\delta^*, \mathbf{w}^*)\|_{\infty}$ .

**Lemma 4.** Under Assumptions 1, 5, 6 and 7 holds, and if

$$\lambda_n \geq \sqrt{\frac{K'_1 \log d}{|\bar{X}^p(\delta^*)|}} + \frac{2C_r^2 C_q |X_q \setminus \bar{X}^q(\delta^*)|}{n_q} \quad (30)$$

$\|\nabla_{\delta} \mathcal{L}(\delta^*, \mathbf{w}^*)\|_{\infty} \leq \lambda_n$  with probability at least  $1 - \exp(-c'_1 |\bar{X}^p(\delta^*)|)$ , where  $c'_1$  and  $K'_1$  are constants,

See Section 8.7 in Appendix for the proof.

Finally, we can restate Theorem 1 as Theorem 3 using  $\kappa_1 = \frac{\nu \kappa'_1}{2C_r^2}$ ,  $\tau_1(n, d) = \frac{\nu c}{2C_r^2 \sqrt{n_q}}$ ,  $\kappa_2 = 2\sqrt{k} C_{\text{CDF}} C_p$ ,  $\tau_2(n, d) = \frac{2L \cdot C_p}{\sqrt{n_p}}$  and (30), making sure that  $\kappa_1 > \kappa_2$ .

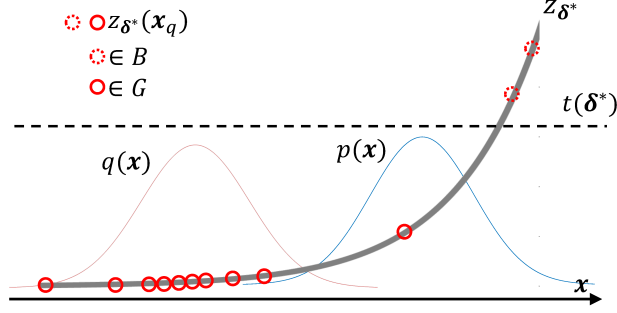

Figure 4: An illustration of  $B$  and  $G$  in the case of truncation setting. In this setting, we treat  $X_q \setminus \bar{X}^q(\delta^*)$  as a kind of outlier of  $Q$  and only appear in very small quantity.

### 8.7 Proof of Lemma 4

First, we recycle some notations from the previous section:  $G := \bar{X}^q(\delta^*)$ ,  $B := X_q \setminus \bar{X}^q(\delta^*)$ . The reason for this arrangement can be seen from Figure 4.

Denote  $e^{(j)} := \exp[\langle \delta^*, \mathbf{x}_q^{(j)} \rangle]$ ,  $s := \sum_{j=1}^{n_q} e^{(j)}$  and  $\bar{s} = \sum_{i \in G} e^{(i)}$ . Note that

$$\nabla_{\delta} \mathcal{L}(\delta^*, \mathbf{w}^*) = \frac{1}{n_p} \sum_{i \in \bar{X}^p(\delta^*)} [\mathbf{x}_p^{(i)} - \nabla_{\delta} \log \hat{N}(\delta^*)].$$

$$\begin{aligned} \|\nabla_{\delta} \mathcal{L}(\delta^*, \mathbf{w}^*)\|_{\infty} &= \left\| \frac{1}{n_p} \sum_{i \in \bar{X}^p(\delta^*)} [\mathbf{x}_p^{(i)} - \nabla_{\delta} \log \hat{N}(\delta^*)] \right\|_{\infty} \\ &= \frac{1}{n_p} \left\| \sum_{i \in \bar{X}^p(\delta^*)} \left[ \mathbf{x}_p^{(i)} - \sum_{j=1}^{n_q} \frac{e^{(j)}}{s} \mathbf{x}_q^{(j)} \right] \right\|_{\infty} \\ &= \frac{1}{n_p} \left\| \sum_{i \in \bar{X}^p(\delta^*)} \left[ \mathbf{x}_p^{(i)} - \sum_{j \in G} \frac{e^{(j)}}{s} \mathbf{x}_q^{(j)} - \sum_{j \in B} \frac{e^{(j)}}{s} \mathbf{x}_q^{(j)} \right] \right\|_{\infty} \\ &= \frac{1}{n_p} \left\| \sum_{i \in \bar{X}^p(\delta^*)} \left[ \mathbf{x}_p^{(i)} - \frac{\bar{s}}{s} \sum_{j \in G} \frac{e^{(j)}}{\bar{s}} \mathbf{x}_q^{(j)} - \sum_{j \in B} \frac{e^{(j)}}{s} \mathbf{x}_q^{(j)} \right] \right\|_{\infty} \\ &= \frac{1}{n_p} \left\| \sum_{i \in \bar{X}^p(\delta^*)} \left[ \mathbf{x}_p^{(i)} - \sum_{j \in G} \frac{e^{(j)}}{\bar{s}} \mathbf{x}_q^{(j)} + (1 - \frac{\bar{s}}{s}) \sum_{j \in G} \frac{e^{(j)}}{\bar{s}} \mathbf{x}_q^{(j)} - \sum_{j \in B} \frac{e^{(j)}}{s} \mathbf{x}_q^{(j)} \right] \right\|_{\infty} \\ &\leq \underbrace{\frac{1}{n_p} \left\| \sum_{i \in \bar{X}^p(\delta^*)} \left[ \mathbf{x}_p^{(i)} - \sum_{j \in G} \frac{e^{(j)}}{\bar{s}} \mathbf{x}_q^{(j)} \right] \right\|_{\infty}}_{a(n,d)} + \left\| (1 - \frac{\bar{s}}{s}) \sum_{j \in G} \frac{e^{(j)}}{\bar{s}} \mathbf{x}_q^{(j)} - \sum_{j \in B} \frac{e^{(j)}}{s} \mathbf{x}_q^{(j)} \right\|_{\infty} \\ &\leq a(n,d) + \frac{s - \bar{s}}{s} \sum_{j \in G} \left\| \frac{e^{(j)}}{\bar{s}} \mathbf{x}_q^{(j)} \right\|_{\infty} + \sum_{j \in B} \left\| \frac{e^{(j)}}{s} \mathbf{x}_q^{(j)} \right\|_{\infty} \\ &\leq a(n,d) + \frac{C_r^2 |B|}{n_q} \cdot \frac{1}{|G|} \sum_{j \in G} \|\mathbf{x}^{(j)}\|_{\infty} + \frac{C_r}{n_q} \sum_{j \in B} \|\mathbf{x}_q^{(j)}\|_{\infty} \\ &\leq a(n,d) + \frac{C_r^2 |B| C_q}{n_q} + \frac{C_r |B| C_q}{n_q} \\ &\leq a(n,d) + \frac{2C_r^2 |B| C_q}{n_q} \end{aligned}$$

Now, as  $\overline{X}^p(\delta^*)$  and  $G$  contains only i.i.d. samples and due to the definition of  $\delta^*$ , we can invoke Lemma 2 again from [14] to bound  $a(n, d)$ . That is if Assumptions 6 and 7 hold and  $n_q = \Omega(n_p^2)$ , and  $\lambda_n \geq \sqrt{\frac{K'_1 \log d}{|\overline{X}^p(\delta^*)|}}$

$$P(a(n, d) \geq \lambda_n) \leq \exp(-c'_1 |\overline{X}^p(\delta^*)|), \quad (31)$$

where  $K'_1$  and  $c'_1$  are constants. By taking the extra  $\frac{2C_r^2|B|C_d}{n_q}$  into account, we obtain Lemma 4.

### 8.8 Proof of Lemma 3

Before we start, we need to define a few empirical counterparts of population quantities used in Section 5.3.

- $P_n$  is the empirical distribution of  $P$ .
- $\hat{t}(\delta)$  is the empirical version of  $t(\delta)$  and is defined according to

$$P_{n_p}[\hat{z}_\delta < \hat{t}_\nu(\delta)|X_q] \leq \nu, \quad P_{n_p}[\hat{z}_\delta \leq \hat{t}_\nu(\delta)|X_q] \geq \nu$$

- The set  $\overline{X}_n(\delta)$  is similar to  $\overline{X}(\delta)$  but defined by  $\hat{z}$  and  $\hat{t}$ :

$$\overline{X}_n(\delta) := \{\mathbf{x} \in \mathbb{R}^d | \hat{z}_\delta(\mathbf{x}) < \hat{t}(\delta)\}.$$

- $\overline{X}_n^p(\delta) := X_p \cap \overline{X}_n(\delta)$ .
- The “borderline points” of  $X_p$ :  $X_{\text{border}}(\delta) := \{\mathbf{x} \in X_p | \hat{z}_\delta(\mathbf{x}) = \hat{t}_\nu(\delta)\}$ .

*Proof.* We first expand  $\|\nabla_\delta \mathcal{L}(\hat{\delta}, \hat{\mathbf{w}}) - \nabla_\delta \mathcal{L}(\hat{\delta}, \mathbf{w}^*)\|_\infty$  as

$$\begin{aligned} & \|\nabla_\delta \mathcal{L}(\delta^* + \hat{\mathbf{u}}, \hat{\mathbf{w}}) - \nabla_\delta \mathcal{L}(\delta^* + \hat{\mathbf{u}}, \mathbf{w}^*)\|_\infty \\ &= \left\| \sum_{i, w_i \neq 0} \hat{w}_i \mathbf{x}_p^{(i)} - \frac{1}{n_p} \sum_{i \in \overline{X}^p(\delta^*)} \mathbf{x}_p^{(i)} \right\|_\infty \\ &\leq \frac{1}{n_p} \sum_{i \in \underbrace{\overline{X}_n^p(\delta^* + \hat{\mathbf{u}}) \setminus \overline{X}^p(\delta^*)}_{M_1(\hat{\mathbf{u}})}} \|\mathbf{x}_p^{(i)}\|_\infty + \frac{1}{n_p} \sum_{i \in \underbrace{\overline{X}^p(\delta^*) \setminus \overline{X}_n^p(\delta^* + \hat{\mathbf{u}})}_{M_2(\hat{\mathbf{u}})}} \|\mathbf{x}_p^{(i)}\|_\infty \\ &\quad + \frac{1}{n_p} \sum_{i \in X_{\text{border}}(\delta^* + \hat{\mathbf{u}})} \|\mathbf{x}_p^{(i)}\|_\infty \\ &= \frac{1}{n_p} \sum_{i \in M(\hat{\mathbf{u}})} \|\mathbf{x}_p^{(i)}\|_\infty + \frac{1}{n_p} \sum_{i \in X_{\text{border}}(\delta^* + \hat{\mathbf{u}})} \|\mathbf{x}_p^{(i)}\|_\infty, \end{aligned} \quad (32)$$

where  $M(\mathbf{u}) := M_1(\mathbf{u}) \cup M_2(\mathbf{u})$ , given  $\mathbf{u} \in \text{Ball}(\rho)$ . Note we isolate the borderline points  $X_{\text{border}}$  in our analysis as they may have interior weights, i.e.,  $w_i \in [0, \frac{1}{n_p}]$ .

We first figure out the cardinality of  $M(\mathbf{u})$ , a set where samples are *likely* to be “misplaced” to the other set under a small perturbation. However, direct quantifying  $M(\mathbf{u})$  is hard but we now show that  $M(\mathbf{u}) \subseteq X_p \cap T(\mathbf{u}, \epsilon)$  whose cardinality is bounded by our assumptions. See Figure 5 for details.

First, we show that if  $z_{\delta^*}(\mathbf{x}_p) \geq t(\delta^*) + 2C_{\text{lip}}\|\mathbf{u}\| + \epsilon$ , then  $\mathbf{x}_p \notin \overline{X}^p(\delta^*) \cup \overline{X}_n^p(\delta^* + \mathbf{u})$ . As we will see,  $\epsilon \in (0, 1)$  is chosen afterwards.

Under this setting, obviously,  $\mathbf{x}_p \notin \overline{X}^p(\delta^*)$ , thus it is suffice to show that  $\mathbf{x}_p \notin \overline{X}_n^p(\delta^* + \mathbf{u})$ . Note that for any constant  $c$ , the quantile of  $z' := z(\delta^*) + c$  is  $t(\delta^*) + c$ .

Since  $z_{\delta^*}$  and  $\hat{z}_{\delta^*}$  differ only by their normalization functions, we have  $z_{\delta^*}(\mathbf{x}_p) - t(\delta^*) = \hat{z}_{\delta^*}(\mathbf{x}_p) - t'(\delta^*)$ , where  $t'(\delta^*)$  is defined as  $P[\hat{z}_{\delta^*} < t'_\nu(\delta^*)|X_q] \leq \nu$  and  $P[\hat{z}_{\delta^*} \leq t'_\nu(\delta^*)|X_q] \geq \nu$  for a given  $X_q$ , so we have  $\hat{z}_{\delta^*}(\mathbf{x}_p) \geq t'(\delta^*) + 2C_{\text{lip}}\|\mathbf{u}\| + \epsilon$ . Combining this inequality with Assumption 4, we have

$$\hat{z}_{\delta^* + \mathbf{u}}(\mathbf{x}_p) \geq \hat{z}_{\delta^*}(\mathbf{x}_p) - C_{\text{lip}}\|\mathbf{u}\| \geq t'(\delta^*) + C_{\text{lip}}\|\mathbf{u}\| + \epsilon \quad (33)$$

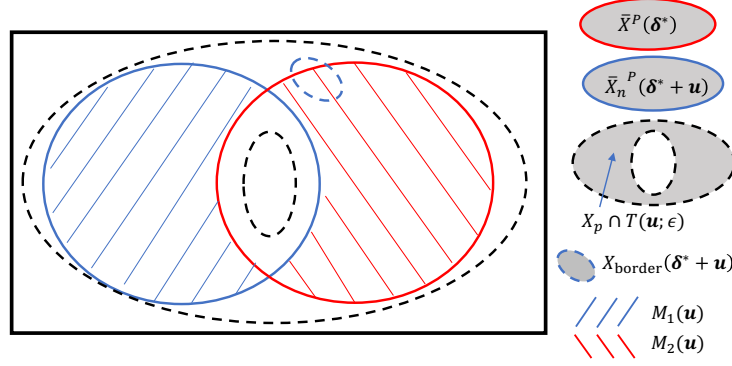

Figure 5: The relationship of  $\bar{X}^P(\delta^*)$ ,  $\bar{X}_n^P(\delta^* + \mathbf{u})$ ,  $X_p \cap T(\mathbf{u}, \epsilon)$  and  $X_{\text{border}}(\delta^* + \mathbf{u})$ .

From Dvoretzky–Kiefer–Wolfowitz inequality if  $n_p$  is large enough, with high probability  $|t'(\delta^*) - \hat{t}(\delta^*)| \leq \frac{L_1}{\sqrt{n_p}} \leq 1$  which is independent of the choice of  $X_q$ . Thus we set  $\epsilon = \frac{L_1}{\sqrt{n_p}}$ , and

$$t'(\delta^*) + \frac{L_1}{\sqrt{n_p}} + C_{\text{lip}}\|\mathbf{u}\| \geq \hat{t}(\delta^*) + C_{\text{lip}}\|\mathbf{u}\| \text{ w.h.p.} \quad (34)$$

From Assumption 4,  $\hat{z}_{\delta^* + \mathbf{u}}$  and  $\hat{z}_{\delta^*}$  differ only by  $C_{\text{lip}}\|\mathbf{u}\|$ , which means their  $\nu$ -percentile  $\hat{t}(\delta^* + \mathbf{u})$  and  $\hat{t}(\delta^*)$  differ by  $C_{\text{lip}}\|\mathbf{u}\|$  at most. Thus,

$$\hat{t}(\delta^*) + C_{\text{lip}}\|\mathbf{u}\| \geq \hat{t}(\delta^* + \mathbf{u}) \quad (35)$$

From (33) (34) and (35), we now have  $\hat{z}_{\delta^* + \mathbf{u}}(\mathbf{x}_p) \geq \hat{t}(\delta^* + \mathbf{u})$  which means

$$\mathbf{x}_p \notin \bar{X}_n^P(\delta^* + \mathbf{u})$$

with high probability. As we have mentioned earlier, it is obvious that  $\mathbf{x}_p \notin \bar{X}^P(\delta^*)$ , so

$$\mathbf{x}_p \notin \bar{X}^P(\delta^*) \cup \bar{X}_n^P(\delta^* + \mathbf{u}). \quad (36)$$

Similarly, one can show if  $z_{\delta^*}(\mathbf{x}_p) \leq t(\delta^*) - 2C_{\text{lip}}\|\mathbf{u}\| - \epsilon$ , then

$$\mathbf{x}_p \in \bar{X}_n^P(\delta^* + \mathbf{u}) \cap \bar{X}^P(\delta^*) \quad (37)$$

(which is the center-most region in Figure 5) with high probability. Now we can conclude that:

$$M(\mathbf{u}) \subseteq X_p \cap T(\mathbf{u}, \frac{L_1}{\sqrt{n_p}}) \text{ w.h.p.} \quad (38)$$

Due to Dvoretzky–Kiefer–Wolfowitz inequality,

$$P_{n_p}(\mathbf{x}_p \in T(\mathbf{u}, \frac{L_1}{\sqrt{n_p}})) - P(\mathbf{x}_p \in T(\mathbf{u}, \frac{L_1}{\sqrt{n_p}})) \leq \frac{L_2}{\sqrt{n_p}}$$

holds with probability at least  $\exp[-2L_2^2]$ ,  $\forall L_2 > 0$ . Thus, using Assumption 4 we have

$$P_{n_p}(\mathbf{x}_p \in T(\mathbf{u}, \frac{L_1}{\sqrt{n_p}})) \leq C_{\text{CDF}} \cdot \|\mathbf{u}\| + \frac{L_1}{\sqrt{n_p}} + \frac{L_2}{\sqrt{n_p}} \text{ w.h.p.}$$

Now we know the cardinality of  $X_p \cap T(\mathbf{u}, \frac{L_1}{\sqrt{n_p}})$  can be bounded by  $(C_{\text{CDF}} \cdot \|\mathbf{u}\| + \frac{L_1 + L_2}{\sqrt{n_p}}) \cdot n_p$  with high probability. Finally, we have

$$\begin{aligned} \frac{1}{n_p} \sum_{i \in X_p \cap T(\mathbf{u}, \frac{L_1}{\sqrt{n_p}})} \|\mathbf{x}_p^{(i)}\|_\infty &\leq \frac{1}{n_p} \left( C_{\text{CDF}} \cdot \|\mathbf{u}\| + \frac{L_1 + L_2}{\sqrt{n_p}} \right) \cdot n_p C_p \\ &\leq C_{\text{CDF}} \cdot \|\mathbf{u}\| C_p + \frac{(L_1 + L_2) \cdot C_p}{\sqrt{n_p}} \end{aligned} \quad (39)$$

Now, we show  $X_{\text{border}}(\delta^* + \mathbf{u}) \subseteq X_p \cap T(\mathbf{u}, \frac{L_1}{\sqrt{n_p}})$ . The proof for this is similar to the arguments above. Using Assumption 4, it can be shown that

$$\hat{t}(\delta^* + \mathbf{u}) \in \left[ t'(\delta^*) - C_{\text{lip}}\|\mathbf{u}\| - \frac{L_1}{\sqrt{n_p}}, t'(\delta^*) + C_{\text{lip}}\|\mathbf{u}\| + \frac{L_1}{\sqrt{n_p}} \right],$$

and from definition,  $\forall \mathbf{x} \in X_{\text{border}}(\delta^* + \mathbf{u})$ ,  $\hat{z}_{\delta^* + \mathbf{u}}(\mathbf{x}) = \hat{t}(\delta^* + \mathbf{u})$ ,

$$\hat{z}_{\delta^* + \mathbf{u}}(\mathbf{x}) \in \left[ t'(\delta^*) - C_{\text{lip}}\|\mathbf{u}\| - \frac{L_1}{\sqrt{n_p}}, t'(\delta^*) + C_{\text{lip}}\|\mathbf{u}\| + \frac{L_1}{\sqrt{n_p}} \right],$$

and due to Assumption 4,

$$\hat{z}_{\delta^*}(\mathbf{x}) \in \left[ t'(\delta^*) - 2C_{\text{lip}}\|\mathbf{u}\| - \frac{L_1}{\sqrt{n_p}}, t'(\delta^*) + 2C_{\text{lip}}\|\mathbf{u}\| + \frac{L_1}{\sqrt{n_p}} \right].$$

Again, this relationship does not change if we replace  $\hat{z}$  and  $t'$  at the same time with  $z$  and  $t$

$$z_{\delta^*}(\mathbf{x}) \in \left[ t(\delta^*) - 2C_{\text{lip}}\|\mathbf{u}\| - \frac{L_1}{\sqrt{n_p}}, t(\delta^*) + 2C_{\text{lip}}\|\mathbf{u}\| + \frac{L_1}{\sqrt{n_p}} \right] \subseteq T(\mathbf{u}, \frac{L_1}{\sqrt{n_p}}). \quad (40)$$

Inequalities (32), (38), (39) and (40) complete the proof.  $\square$

## 9 Numerical Analysis

In this section, we present a few numerical experimental results under outlier and truncation setting. In all experiments, we set  $n_p = n_q = 5000$ ,  $\lambda = 0$ , and the solution of  $\hat{\delta}$  was obtained using Algorithm 1. We let  $f(x) = x$ . Note this is the correct log-ratio model for two Gaussian distributions with different means.

**Outlier Setting** In this setting, we first generate two “good” datasets  $G \stackrel{\text{i.i.d.}}{\sim} p(x) = N(0, 1)$ , and  $X_q \stackrel{\text{i.i.d.}}{\sim} q(x) = N(-.75, 1)$ . The outlier set  $B_b$  is generated from a uniform distribution  $U(-0.4 + b, 0.4 + b)$ ,  $b \in [0, 6]$ . The density ratio estimation is performed using two sets of data:  $X_{p,b} = \{G, B_b\}$  and  $X_q$ , where the cardinality of  $B$  is 1000. We repeat the estimation using different choices of  $b$  and test its influence on our estimate  $\hat{r}(\mathbf{x}; \hat{\delta}_b)$ . The results can be seen from Figure 6, where the histograms of  $G$  and  $X_q$  are colored red and green respectively. The true density ratio  $\frac{p(x)}{q(x)}$  is plotted as a dotted line. The histograms of  $B_b$  with different choices of  $b$  was plotted using gradient colors from light blue to purple (we skipped some choices of  $b$  for better visualization). For each  $b$ , we run the density ratio estimation, and plot learned  $\hat{r}(\mathbf{x}; \hat{\delta}_b)$  using the same gradient color. In the figure, we rescale  $\hat{r}(\mathbf{x}; \hat{\delta}_b)$  and the true density ratio using a same constant, so they can be plotted alongside with the histogram. Here, we test two methods: the log-Linear KLIEP and the robust estimator proposed in this paper.

It can be easily seen that as  $b \rightarrow 6$ , KLIEP (Figure 6a) tends to significantly overestimate the density ratio and is sensitive to the change of  $b$ . The proposed method (Figure 6b), tends to underestimate the density ratio when  $b$  is small. However, as  $b$  gradually shifts away from the center of  $X_p$ , leaving the “gap” between inlier and outlier, the robust estimator converges to the true density ratio function.

**Truncated Setting** In this setting, we generate samples  $X_p \stackrel{\text{i.i.d.}}{\sim} p(x) = N(0, 1)$  without any contamination. Usually, the  $\nu$ -th quantile of  $z(\mathbf{x}_p; \delta^*)$  cannot be analytically computed as we do not know the true density ratio. However, it can be seen that for a strictly monotone increasing  $z(\mathbf{x}_p, \delta^*)$ , samples in the  $\nu$ -th quantile of  $z(\mathbf{x}_p, \delta^*)$  must be in the  $\nu$ -th quantile of  $x_p$  since the relative order among  $x_p$  is preserved after a strictly monotone transform. Thus, we obtain the truncation domain  $\bar{X}(\delta^*) = \{-\infty \leq x \leq \Phi^{-1}(\nu)\}$ , where  $\Phi^{-1}$  is the inverse CDF of  $N(0, 1)$ . We then generate samples  $X_q \sim TN(-0.5, 1, -\infty, \Phi^{-1}(\nu))$ , where  $TN$  is a truncated Gaussian distribution and the last two parameters are the truncation borders. Note we set the mean of  $Q$  to be a negative value so that the true density ratio  $\bar{p}/\bar{q}$  is a monotone increasing function.

The results for  $\nu = 0.5$  are plotted on Figure 7 where the true truncated ratio is plotted as a dotted line. It can be seen that the learned  $\hat{r}(\mathbf{x}; \hat{\delta})$  is fairly close to the true truncated density ratio.

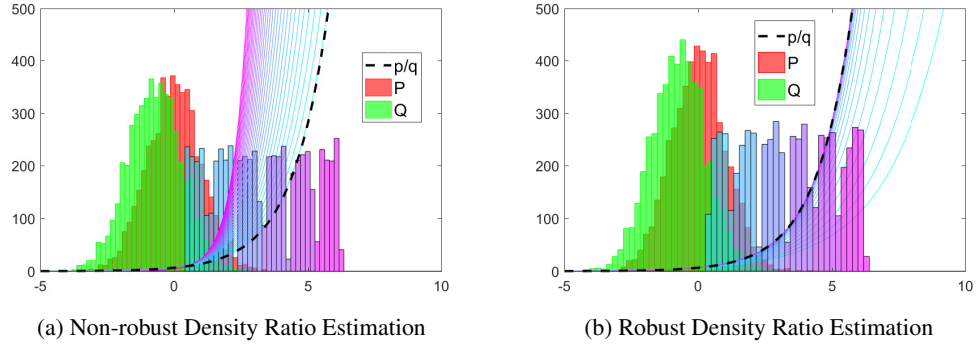

Figure 6: Outlier Setting

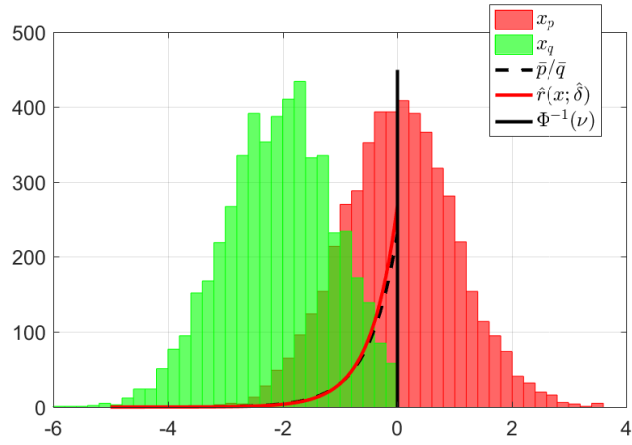

Supplement: Supplementary file [file ea204361fe7f024b130143eb3e189a18-Supplemental.zip]
